# Supplementary material for: Selective delivery of low-affinity IL-2 to PD-1+ T cells rejuvenates antitumor immunity with reduced toxicity
Source: PubMed Central journal article supplement (PMC8803347; doi:10.1172/jci153604), 2022-02-01
Supplement: jci-132-153604-s203.pdf [file jci-132-153604-s203.pdf]

## Supplemental material

**Supplemental Table. Used antibody list**

| Antibody                                       | Company        | Catalog number |
|------------------------------------------------|----------------|----------------|
| InVivoMAb anti-mouse CD4 (GK1.5)               | Bio X Cell     | Cat# BE0003-1  |
| InVivoMAb anti-mouse CD8 (53-5.8)              | Bio X Cell     | Cat# BE0223    |
| InVivoMAb anti-mouse IL2R $\beta$ (TM-Beta 1)  | Bio X Cell     | Cat# BE0298    |
| InVivoMAb anti-mouse PD1 (J43)                 | Bio X Cell     | Cat# BE0033-2  |
| Anti asialo GM1 (Rabbit) EX                    | Wako           | Cat# 986-10001 |
| Anti-PDL1 (Atezolizumab)                       | Genentech      | TECENTRIQ®     |
| Ultra-LEAF™ Purified anti-mouse CD3 $\epsilon$ | BioLegend      | Cat# 100340    |
| Ultra-LEAF™ Purified anti-mouse CD28           | BioLegend      | Cat# 102116    |
| Anti-mCD45 (Flow cytometry, 30-F11)            | BioLegend      | Cat# 103126    |
| Anti-mCD3 (Flow cytometry, 145-2C11)           | BD Biosciences | Cat# 564379    |
| Anti-mCD4(Flow cytometry, RM4-5)               | BioLegend      | Cat# 100526    |
| Anti-mCD8 (Flow cytometry, 53-6.7)             | BioLegend      | Cat# 100730    |
| Anti-mFoxp3 (Flow cytometry, MF-14)            | BioLegend      | Cat# 126408    |
| Anti-mKi67 (Flow cytometry, 16A8)              | BioLegend      | Cat# 652413    |
| Anti-mPD1 (Flow cytometry, 29F.1A12)           | BioLegend      | Cat# 135224    |
| Anti-mTIM3 (Flow cytometry, RMT3-23)           | BioLegend      | Cat# 119716    |
| Anti-mCD107a (Flow cytometry, 1D4B)            | BioLegend      | Cat# 121608    |
| Anti-mIFN $\gamma$ (Flow cytometry, XMG1.2)    | BioLegend      | Cat# 505808    |
| Anti-mIL2R $\alpha$ (Flow cytometry, PC61)     | BD Biosciences | Cat# 564021    |

|                                                |                |             |
|------------------------------------------------|----------------|-------------|
| Anti-mIL2R $\beta$ (Flow cytometry, 5H4)       | BD Biosciences | Cat# 744995 |
| Anti-mIL2R $\gamma$ (Flow cytometry, 4G3)      | BD Biosciences | Cat# 554457 |
| Anti-Fc $\gamma$ III/II receptor (clone 2.4G2) | BD Biosciences | Cat# 553141 |

**Supplemental Figure 1. PD1-IaIL2 selectively targets intratumoral CD8<sup>+</sup> T cells. (Related to Figure 1)**

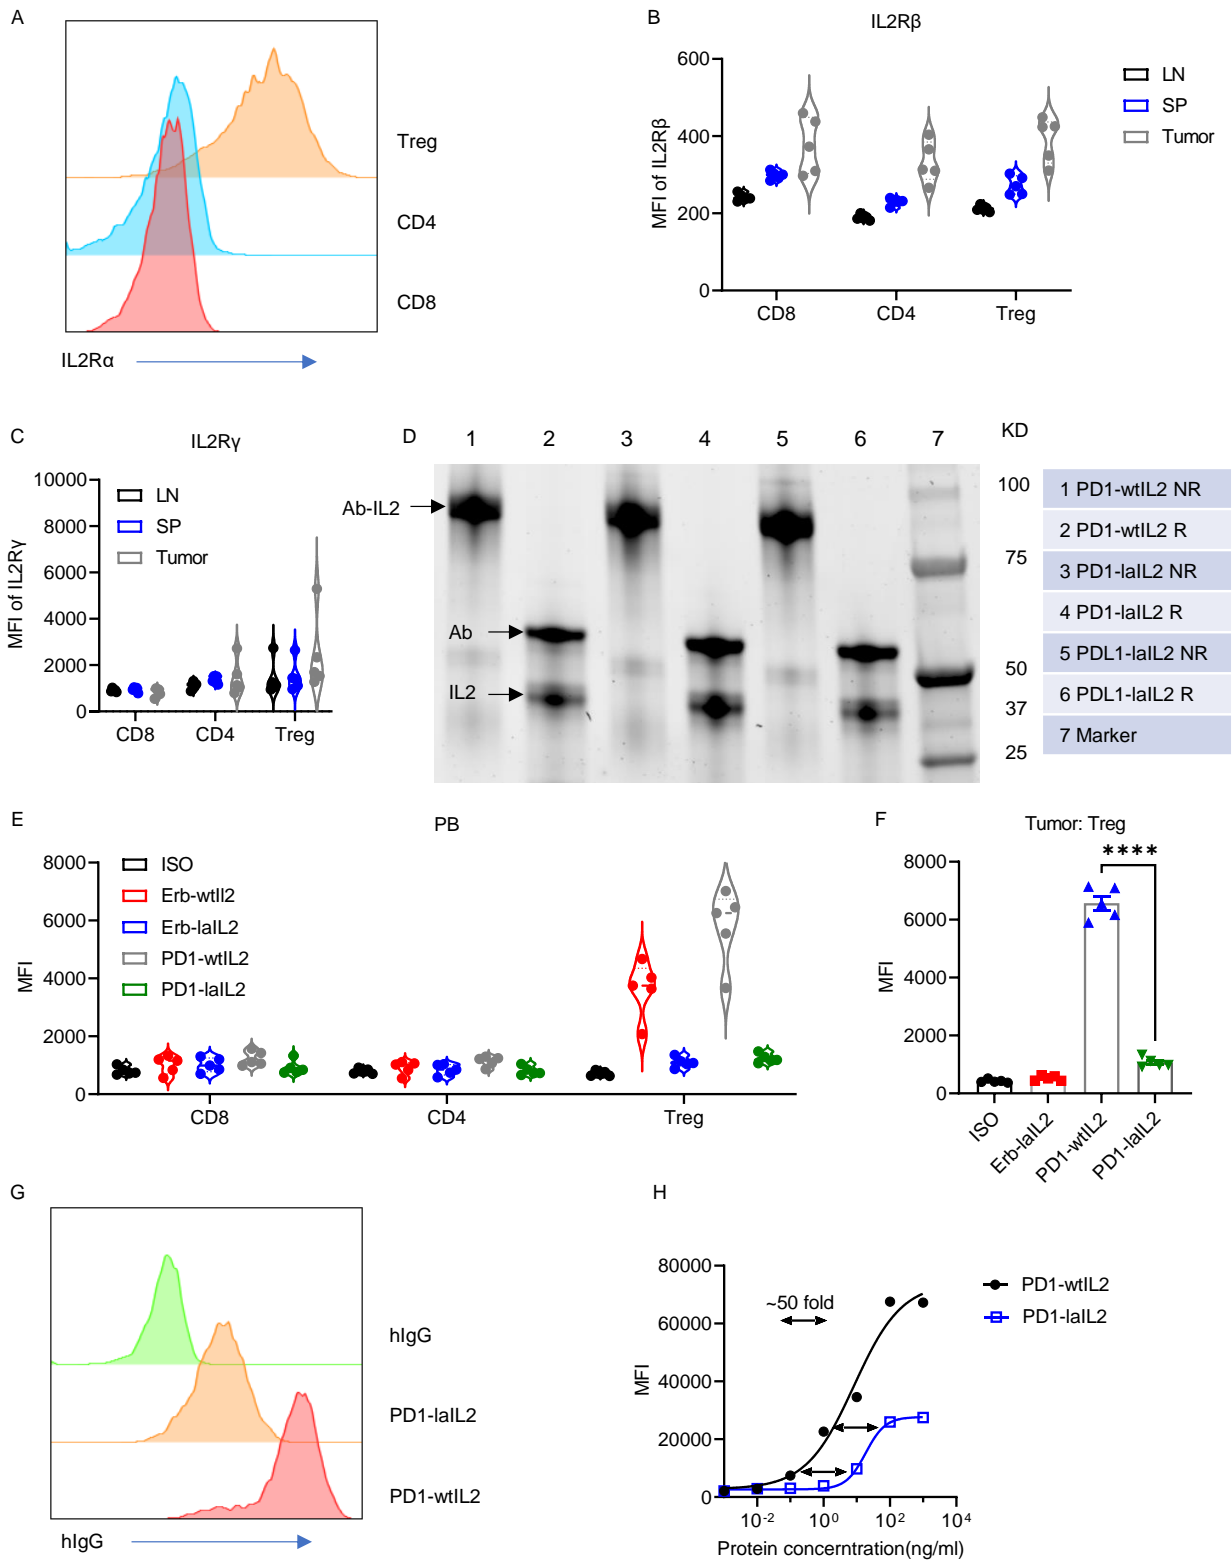

(A) Representative IL2R $\alpha$  expression on CD8<sup>+</sup>, CD4<sup>+</sup> and Treg cells in the spleens of A20 tumor-bearing mice.

(B, C) IL2R $\beta$  (B) and IL2R $\gamma$  (C) expression on CD8<sup>+</sup>, CD4<sup>+</sup> and Treg cells in lymph node, spleen and tumor samples (indicated as LN, SP and tumor in the figures) from tumor-bearing mice (n = 5/group).

(D) SDS-PAGE of purified proteins under nonreducing (NR) and reducing (R) conditions.

(E) Erb-wtIL2, Erb-laIL2, PD1-wtIL2 and PD1-laIL2 bind to Treg, CD8<sup>+</sup> and CD4<sup>+</sup> T cells in the peripheral blood (PB) of A20 tumor-bearing mice (n = 5/group).

(F) Erb-laIL2, PD1-wtIL2 and PD1-laIL2 bind to Treg cells in the tumor of tumor-bearing mice (n = 5/group).

(G, H) PD1-wtIL2 and PD1-laIL2 bind to HEK-Blue™ IL-2 cells.

Data represent mean  $\pm$  SEM. The *P* value was determined by one-way ANOVA with Tukey's multiple comparisons test (F).

**Supplemental Figure 2. PD1 antibody-armed laIL2 has enhanced tumor control. (Related to Figure 2)**

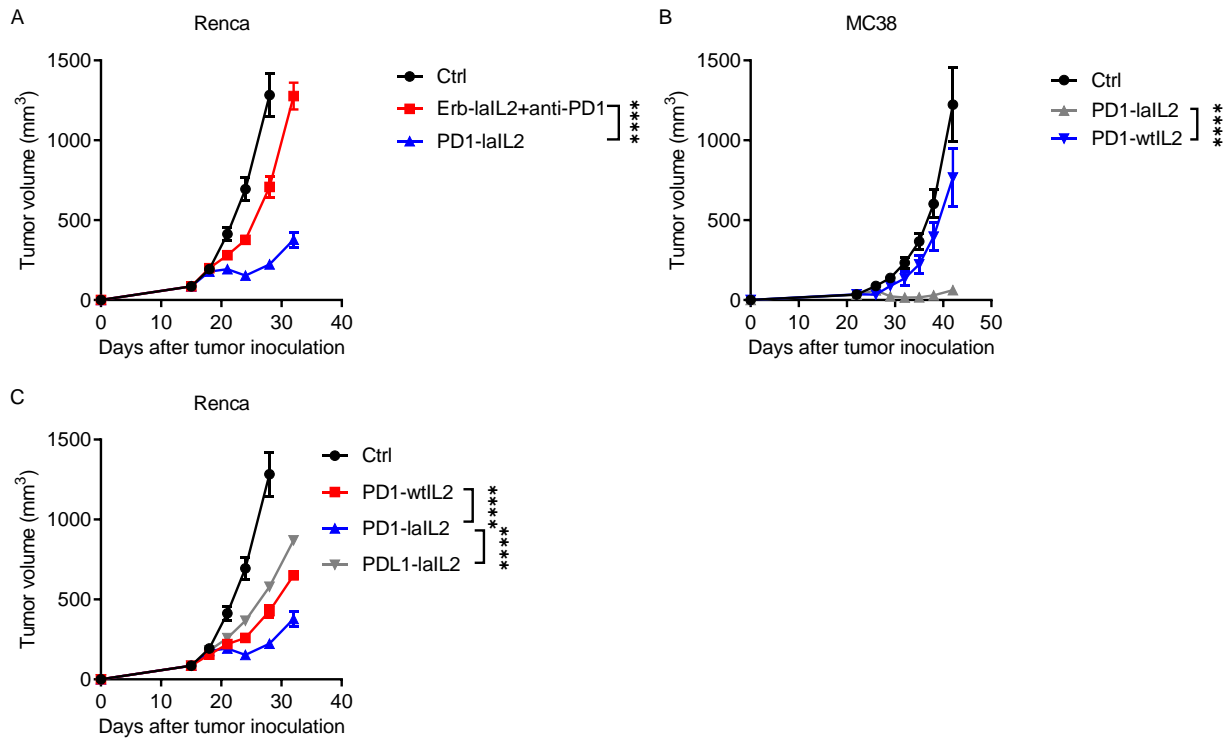

(A) Renca tumor-bearing mice (n = 5/group) were treated with equal molar amounts of Erb-laIL2 (100 µg) and anti-PD1 (50 µg) or PD1-laIL2 (100 µg) on day 16. Tumor growth was assessed twice a week.

(B) MC38 tumor-bearing mice (n = 5/group) were treated with 20 µg of PD1-laIL2 or PD1-wtIL2 on day 22. Tumor growth was assessed twice a week.

(C) Renca tumor-bearing mice (n = 5/group) were treated with 100 µg of PD1-laIL2, PD1-wtIL2, or PDL1-laIL2 on day 16. Tumor growth was assessed twice a week.

Data represent mean ± SEM. The *P* value was determined by two-way ANOVA with Geisser-Greenhouse correction (A-C).

**Supplemental Figure 3. Antitumor efficacy of PD1-laIL2 depends on intratumoral CD8<sup>+</sup> T cells. (Related to Figure 3)**

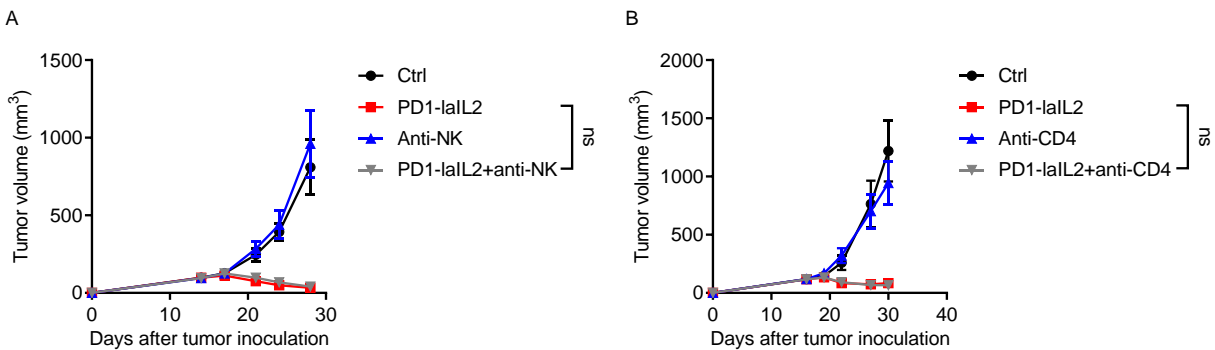

**(A)** A20 tumor-bearing mice (n = 5/group) were treated with 20  $\mu$ g of PD1-laIL2 on day 17. Anti-NK antibody (20  $\mu$ g/mouse) was administered twice a week starting on day 16. Tumor growth was assessed twice a week.

**(B)** A20 tumor-bearing mice (n = 5/group) were treated with 20  $\mu$ g of PD1-laIL2 on day 17. Anti-CD4 (200  $\mu$ g/mouse) was administered twice a week starting on day 16. Tumor growth was assessed twice a week.

Data represent mean  $\pm$  SEM. The *P* value was determined by two-way ANOVA with Geisser-Greenhouse correction (**A**, **B**).

**Supplemental Figure 4. PD1-IaIL2 increases the abundance of tumor-specific CD8<sup>+</sup> T cells.**  
**(Related to Figure 4)**

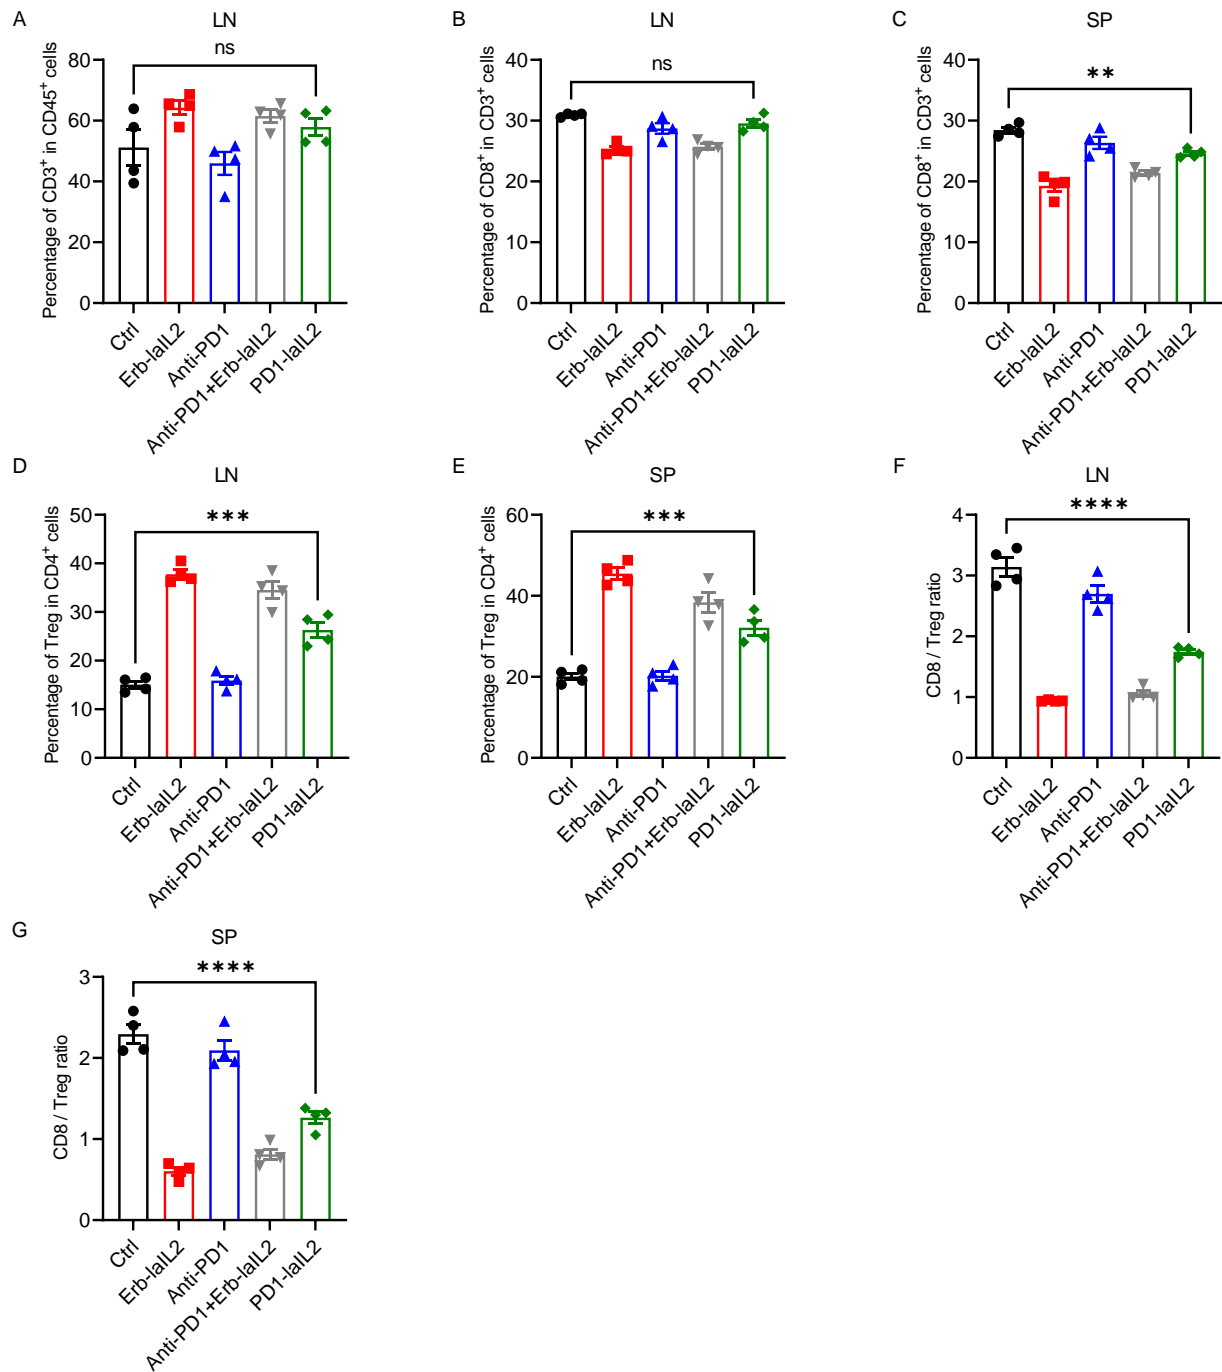

A20 tumor-bearing mice (n = 5/group) were treated with equal molar amounts of Erb-laIL2 (20  $\mu$ g), anti-PD1 (10  $\mu$ g) or PD1-laIL2 (20  $\mu$ g) on day 17. Six days later, T cells from lymph nodes (LNs) and spleens were analyzed.

**(A)** CD3<sup>+</sup> T cell frequency in LNs from different groups is shown.

**(B, C)** CD8<sup>+</sup> T cell frequency in the LNs or spleen from different groups is shown separately in **(B)** and **(C)**.

**(D, E)** CD4<sup>+</sup> T cell frequency in the LNs or spleen from different groups is shown separately in **(D)** and **(E)**.

**(F, G)** The ratio of CD8<sup>+</sup> T cells to Treg cells in the LNs or spleen is shown separately in **(F)** and **(G)**.

Data represent mean  $\pm$  SEM. The *P* value was determined by one-way ANOVA with Tukey's multiple comparisons test **(A-G)**.



**Supplemental Figure 5. PD1-IaIL2 causes the proliferation of PD1<sup>+</sup>TIM3<sup>+</sup>CD8<sup>+</sup> effector T cells. (Related to Figure 5 and Figure 6)**

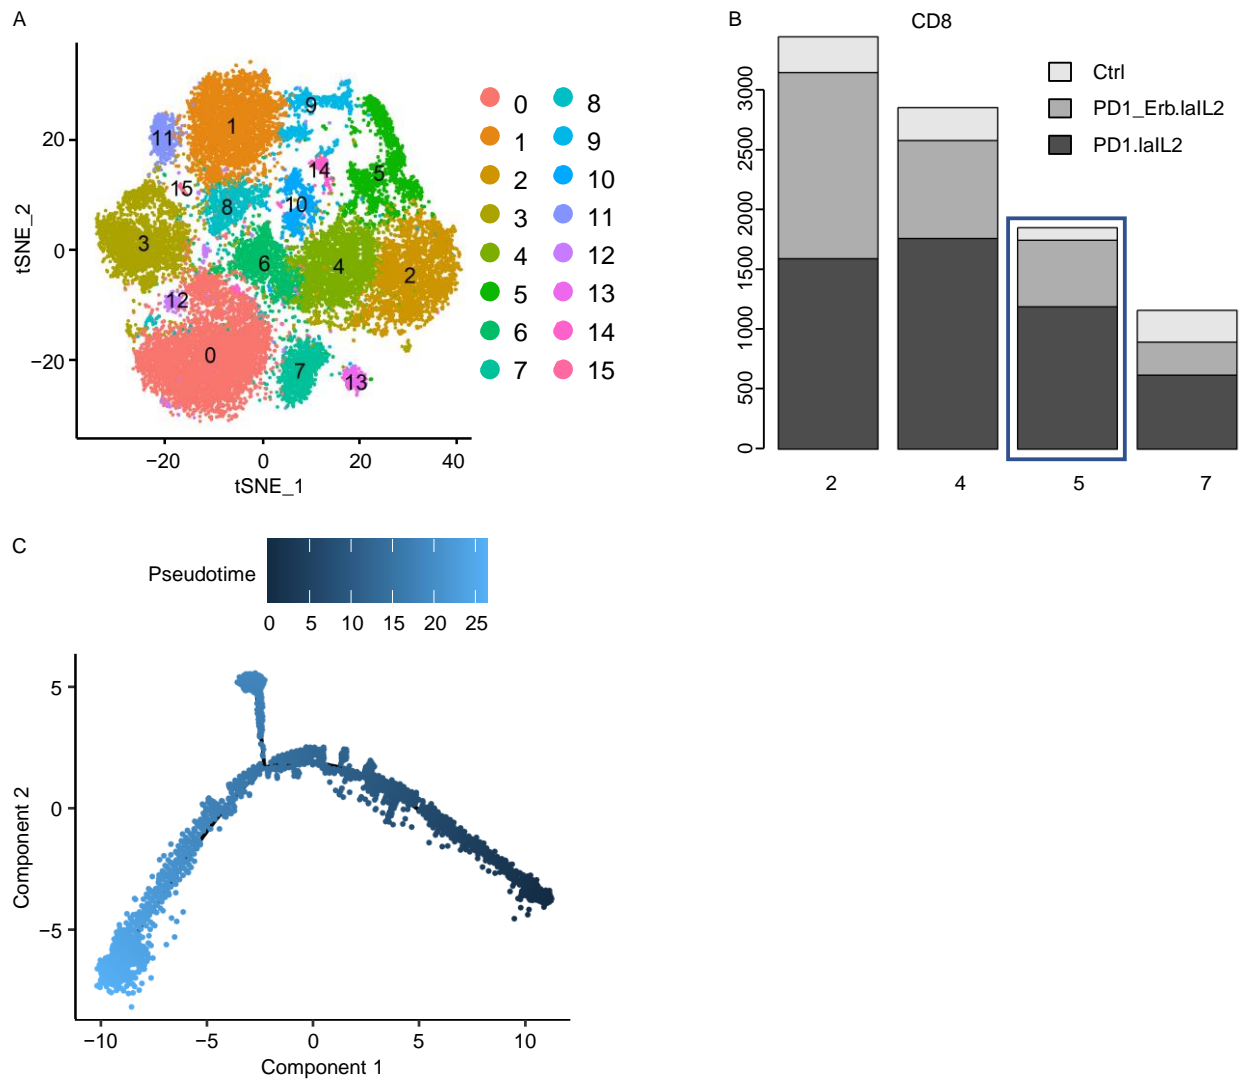

A20 tumor-bearing mice (n = 5/group) were treated with equal molar amounts of Erb-IaIL2 (20  $\mu$ g) and anti-PD1 (10  $\mu$ g) (PD1\_Erb.IaIL2) or PD1-IaIL2 (20  $\mu$ g) on day 17. Three days later, CD3<sup>+</sup> T cells from the tumor were sorted for single-cell RNA sequencing.

**(A)** T cells were separated into 16 clusters.

**(B)** Cell enrichment of each treatment group in CD8<sup>+</sup> T cell clusters.

**(C)** Pseudotime analysis of CD8<sup>+</sup> T cell clusters.

**Supplemental Figure 6. PD1-IaIL2 specifically reactivates PD1<sup>+</sup>TIM3<sup>+</sup> tumor-specific CD8<sup>+</sup> T cells. (Related to Figure 7)**

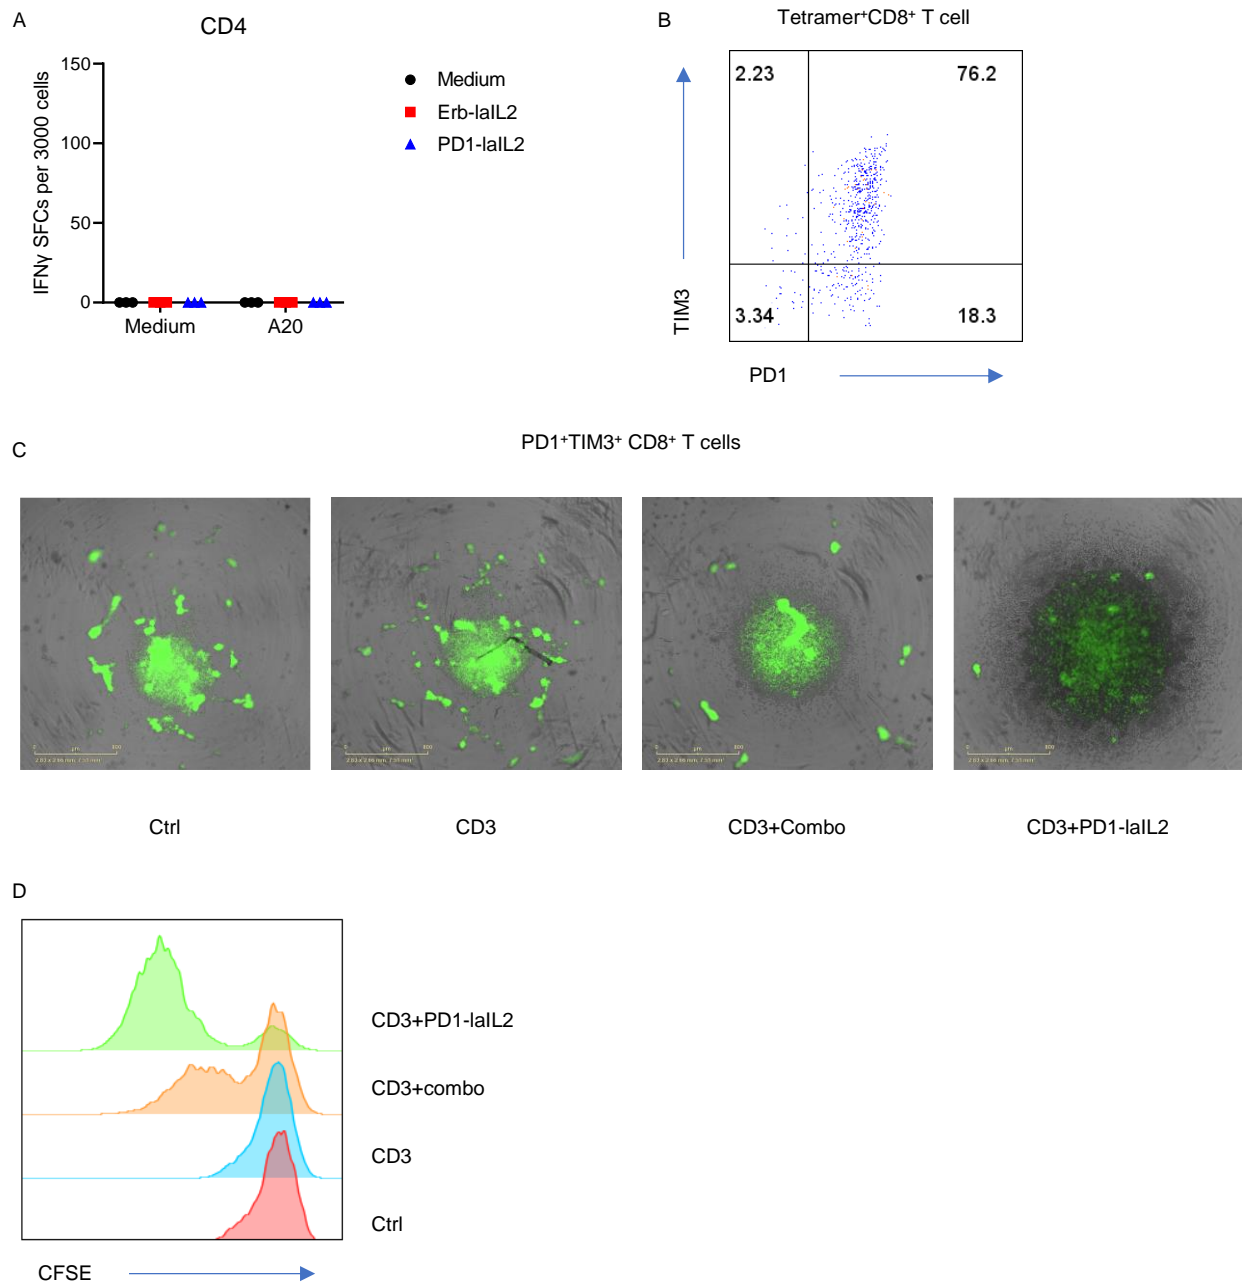

(A) CD4<sup>+</sup>, PD1<sup>-</sup>CD8<sup>+</sup>, PD1<sup>+</sup>TIM3<sup>-</sup>CD8<sup>+</sup> and PD1<sup>+</sup>TIM3<sup>+</sup>CD8<sup>+</sup> T cells from A20 tumor-bearing mice were sorted out and cocultured with irradiated A20 cells in the presence of Erb-IaIL2 or PD1-IaIL2 for the IFN $\gamma$  ELISPOT assay. Spots from CD4<sup>+</sup> T cells are shown.

**(B)** Representative PD1 and TIM3 expressions on tetramer<sup>+</sup>CD8<sup>+</sup> T cells in tumors from MC38 tumor-bearing mice.

**(C, D)** Splenocytes were stimulated with anti-CD3 and anti-CD28 antibodies. Five days later, PD1<sup>+</sup>TIM3<sup>+</sup>CD8<sup>+</sup> T cells were sorted out and labeled with CFSE. Then, the cells were cultured in 96-well plates in the presence of anti-CD3, Erb-1aIL2 plus anti-PD1 (combo) or PD1-1aIL2 for two days. The T cell clusters and CFSE brightness were assayed with an Incucyte® system **(C)**. The representative CFSE brightness is shown in **(D)**.
